# Supplementary material for: Improving oxygen reduction reaction and oxygen evolution reaction activities with Ru–NiCo nanoparticles decorated on porous nitrogen-doped carbon for rechargeable Zn–air batteries and OER electrocatalysts
Source: Royal Society of Chemistry journal article supplement (doi:10.1039/d3ce00693j), 2023-01-01
Supplement: d3ce00693j1.pdf [file d3ce00693j1.pdf]

## Supporting information

### **Improving oxygen reduction reaction and oxygen evolution reaction activities by Ru-NiCo nanoparticles decorated on porous nitrogen-doped carbon for rechargeable Zn-air batteries and OER electrocatalysts**

Lili Sui<sup>2</sup>, Lihua Miao<sup>1,\*</sup>, Ye Kuang<sup>3</sup>, Xiaoyan Shen<sup>1</sup>, Dan Yang<sup>1</sup>, He Huang<sup>1</sup>,

<sup>1</sup>School of Medical Information Engineering, Shenyang Medical College, Shenyang

110043, Liaoning, China

<sup>2</sup>School of pharmacy, Shenyang Medical College, Shenyang, 110043, Liaoning,

China

<sup>3</sup>Shenyang Ligong university, School of Renewable Energy, Shenyang 110136, P. R.

China

## 2. Experimental details

### 2.1. Materials

The melamine, Cobaltous nitrate, and Nickel nitrate were acquired from Tianjin Damao Chemical Reagent Co., Ltd. The Benchmark 20 wt % Pt/C catalyst was obtained from Aladdin. All reagents were utilized as received without undergoing additional purification.

### 2.2. Synthesis of NiCo-MOF nanostructures

Initially, all the reagents were used as received without requiring any further purification. In a standard procedure, 3 mM  $\text{Ni}(\text{NO}_3)_2 \cdot 6\text{H}_2\text{O}$  and 3 mM  $\text{Co}(\text{NO}_3)_2 \cdot 6\text{H}_2\text{O}$  were dissolved in 20 mL of methanol and stirred for 10 minutes to create solution A. Solution B was prepared by dissolving 0.8 g 2-methylimidazole in 20 mL of methanol and stirring for 10 minutes. The two solutions were combined by rapidly pouring solution B into the cobalt nitrate solution, and the stirring continued for 10 minutes. The resulting mixture was allowed to stand at room temperature for 4 hours, followed by three washes with alcohol and deionized water, and then dried overnight at 60 °C. The same approach was used to fabricate Ni-MOF and Co-MOF.

### 2.3. Synthesis of Ru-NiCo-MOF nanostructures

The samples that were prepared earlier were immersed in a solution of 50 mL deionized water and 0.1 mg  $\text{RuCl}_3$ , and the resulting mixture was left to stand at room temperature for 20 minutes.

### 2.4. Synthesis of Ru-NiCo/NC nanostructures

The synthesis of Ru-NiCo/NC nanostructures was performed using an annealing method. Initially, 3 g of melamine was placed in a porcelain boat upstream, while the samples obtained previously were placed downstream. The mixture was then heated at 900 °C for 2 hours under a nitrogen atmosphere. Subsequently, six different samples were obtained, including Ru-NiCo/NC, Ru-Co/NC, NiCo/NC, Co/NC, and Ni/NC.

### *2.5. Materials characterizations*

Crystal structure and element composition of prepared samples were analyzed by X-ray diffraction analyzer (XRD, Rigaku D/max 2500, Cu K $\alpha$ ,  $\lambda = 1.5406 \text{ \AA}$ ) and X-ray photoelectron spectra (XPS, ESCALAB250, Al K $\alpha$  source). The structure and morphology were characterized by scanning electron microscope (SEM, Hitachi SU8020) and transmission electron microscope (TEM, FEI Talos F200X). Brunauer-Emmett-Teller (BET) specific surface areas of the obtained samples were investigated through nitrogen adsorption-desorption analyses using an ASAP 2020.

### *2.6. Electrochemical measurements*

Electrochemistry is measured with CHI760E Electrochemical workstation (Shanghai Chenhua) in a standard three-electrode system. The rotating ring plate electrode (RRDE, glass carbon as disc, with  $A = 0.19625 \text{ cm}^2$ , Pt as a ring,  $A = 0.2198 \text{ cm}^2$ ) was used as the working electrode substrate. 5 mg of catalyst was added into 1000  $\mu\text{L}$  of deionized water, 485  $\mu\text{L}$  isopropanol ( $\text{C}_3\text{H}_8\text{O}$ ) and 30  $\mu\text{L}$  Nafion (5 wt.%), and then a homogenous solution was obtained by ultrasonic treatment for 60 min. 10.4  $\mu\text{L}$  of suspension was dropped on a glass carbon surface and dried at 25°C. Hg/HgO as reference electrode and Pt foil as counter one. and the Ring was

constantly polarized at 0.6 V. The potentials were estimated according to Equations.

$$E_{\text{RHE}} = E_0 + E_{\text{Hg/HgO}} + 0.059 \text{ pH} - I_d R_s \quad (1)$$

Where  $E_0$  is the measured potential and  $E_{\text{Hg/HgO}}$  is 0.098 V,  $I_d$  denotes the disk electrode current and  $R_s$  is the resistance of the electrolyte.

The electron transfer number ( $n$ ) was calculated by the diffusion limiting Current density ( $j_L$ ) at various rotational speeds ( $\omega$ ) according to the Koutecky-Levich equations:

$$1/j = 1/j_L + 1/j_k = 1/B\omega^{1/2} + 1/j_k = 1/(0.2nFC_0D_0^{2/3}\nu^{-1/6}) \omega^{1/2} + 1/j_k \quad (2)$$

where  $F$  and  $\nu$  show the Faraday constant (96485 C mol<sup>-1</sup>) and the kinematic viscosity of the electrolyte (0.01 cm<sup>2</sup> s<sup>-1</sup>);  $C_0$  and  $D_0$  are the bulk concentration (1.2 × 10<sup>-6</sup> mol/cm<sup>3</sup>) and diffusion coefficient (1.9 × 10<sup>-5</sup> cm<sup>2</sup>/s) of O<sub>2</sub> in 0.1 M KOH, respectively.

The value of  $n$  was also determined by H<sub>2</sub>O<sub>2</sub> calculation yield derived from ring current measurements in rotary ring plate electrode (RRED). The H<sub>2</sub>O<sub>2</sub> yield and  $n$  were calculated by with the following equations:

$$\text{H}_2\text{O}_2(\%) = 200 (I_r/N)/(I_d + I_r/N) = 200 I_r/(NI_d + I_r) \quad (3)$$

$$n = 4I_d/(I_d + I_r/N) = 4 NI_d/(NI_d + I_r) \quad (4)$$

Where  $I_r$  and  $N$  are the ring electrode current the collection Pt ring efficiency (0.424).

First principle periodic DFT simulations were carried out with the help of the Vienna Ab Initio Simulation Package (VASP). The projector-augmented wave (PAW) [2] approach was used to describe the electron-ion interactions with the generalized

gradient approximation functional proposed by Perdew et al. (GGA-PBE) [3]. The planewave kinetic energy cutoff was fixed at 400 eV, and the Brillouin zone was sampled using a single (Gamma) k-point. Due to the large computational cells and low geometry, the electronic energies for convergence were set to be  $10^{-4}$  eV.

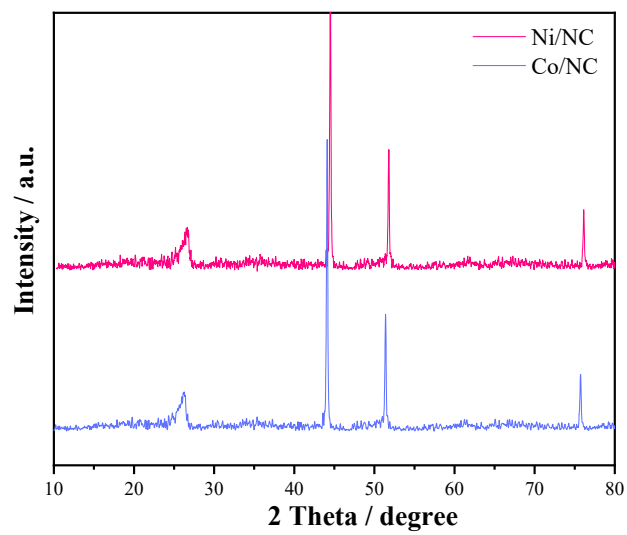

Figure S1 XRD patterns of the samples

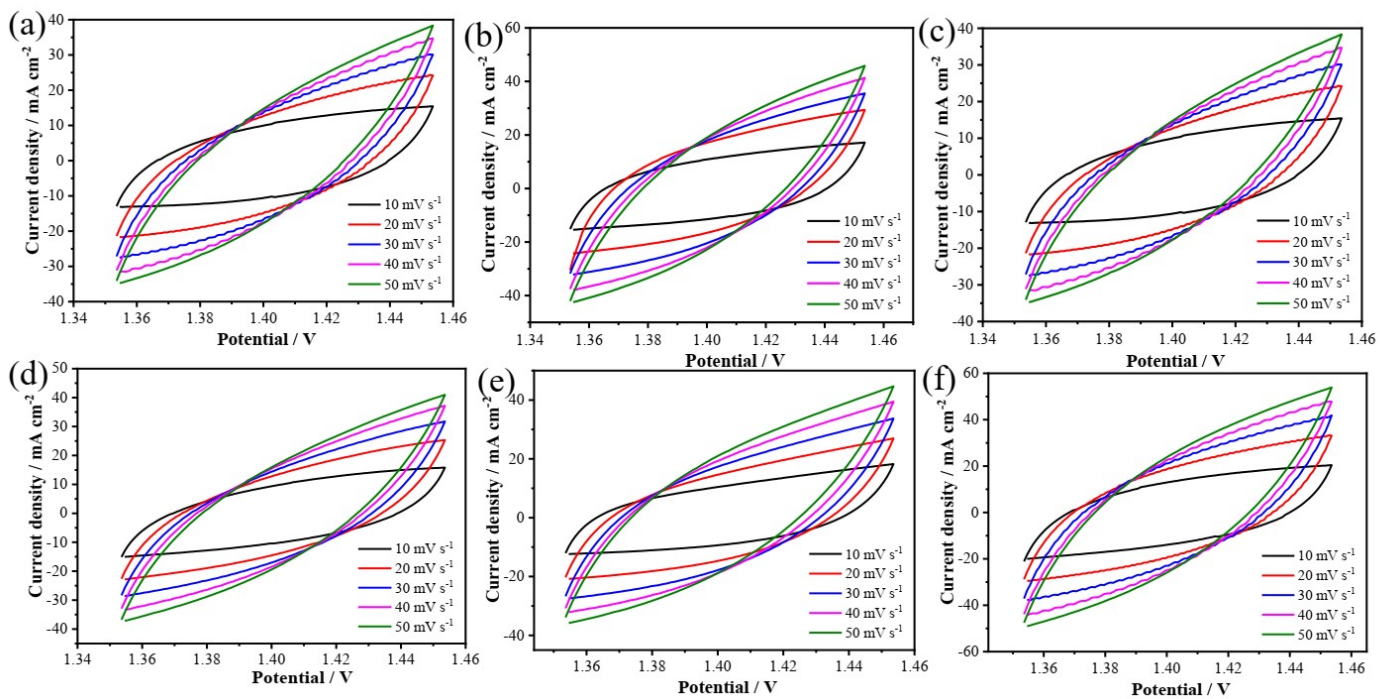

Figure S2 (a) CV curves of the Ru-NiCo/NC samples (b) Ru-Co/NC products (c) Ru-Ni/NC products (d) NiCo/NC products (e) Co/NC samples (f) Ni/NC samples

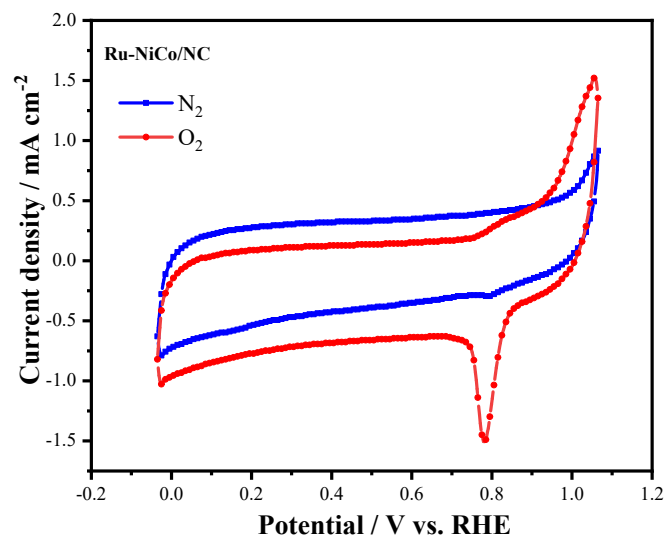

Figure S3 CV curves of the Ru-NiCo/NC samples



Table S1 Summary of the electrochemical performance of the catalysts.

| Samples                              | $E_{1/2}$<br>(V vs. RHE) | ORR Tafel<br>slope<br>(mV dec <sup>-1</sup> ) | $\eta_{10}$ at 10<br>mA<br>cm <sup>-2</sup><br>(mV) | OER Tafel<br>slope<br>(mV dec <sup>-1</sup> ) | ZAB<br>Power<br>Density<br>(mW cm <sup>-2</sup> ) | Reference |
|--------------------------------------|--------------------------|-----------------------------------------------|-----------------------------------------------------|-----------------------------------------------|---------------------------------------------------|-----------|
| Ru-NiCo/NC                           | 0.84                     | 38.18                                         | 342                                                 | 65.75                                         | 132.3                                             | This work |
| CoNi@NC                              | 0.83                     | 58                                            | 400                                                 | 126                                           | 172                                               | S1        |
| CoNi@NCN Ts                          | 0.82                     | 80                                            | 320                                                 | 64                                            | 138                                               | S2        |
| CoNi-CoN <sub>4</sub> -<br>HPC-900   | 0.78                     | 67.0                                          | 470                                                 | 153.0                                         | 116                                               | S3        |
| NiCo@N-C                             | 0.86                     | 79                                            | 280                                                 | 51                                            | 108                                               | S4        |
| Ni <sub>2</sub> Co <sub>2</sub> -CNR | 0.80                     | 83                                            | 310                                                 | 135                                           | 122.1                                             | S5        |

S1. Z. Zhou, X. Zheng, M. Liu, P. Liu, S. Han, Y. Chen, B. Lan, M. Sun and L. Yu, *ChemSusChem*, **2022**, *15*, 202200612.

S2. Z. Zhu, Q. Xu, Z. Ni, K. Luo, Y. Liu, D. Yuan, *ACS Sustain. Chem. Eng.* **2021**, *9*, 13491–13500.

S3. W. W. Tian, J. T. Ren, Z. Y Yuan, *Appl. Catal. B* **2022**, *317*, 121764.

S4. Y. Liu, Z. Chen,; Z. Li, N. Zhao, Y. Xie, Y. Du, J. Xuan, D. Xiong, J. Zhou, L. Cai, Y. Yang, *Nano Energy* **2022**, *99*, 107325.

S5. V. Charles, X. Zhang, M. Yuan, K. Zhang, K. Cui, J. Zhang, T. Zhao, Y. Li, Z. Liu, B. Li, G. Zhang, *Electrochim. Acta* **2022**, *402*, 139555.
